# Supplementary material for: Solution processable silica thin film coating on microporous substrate with high tortuosity: application to a battery separator
Source: Royal Society of Chemistry journal article supplement (doi:10.1039/c3ra42416b), 2013-01-01
Supplement: c3ra42416b.pdf [file c3ra42416b.pdf]

## **Solution processable silica thin film coating on microporous substrate with high tortuosity: Application to battery separator**

Min Kim<sup>1</sup>, Youn Sang Kim<sup>3</sup>, Young-Gi Lee<sup>2\*</sup>, Jong Hyeok Park<sup>1\*</sup>

<sup>a</sup> *School of Chemical Engineering and SKKU Advanced Institute of Nanotechnology, Sungkyunkwan University, Suwon, 440-746, Korea*

<sup>b</sup> *Department of Nano Science and Technology, Graduate School of Convergence Science and Technology, Seoul National University, 1 Gwanak-ro, Gwanak-gu, Seoul 151-744, Korea*

<sup>c</sup> *Power Control Device Research Team, Electronics and Telecommunications Research Institute (ETRI)*

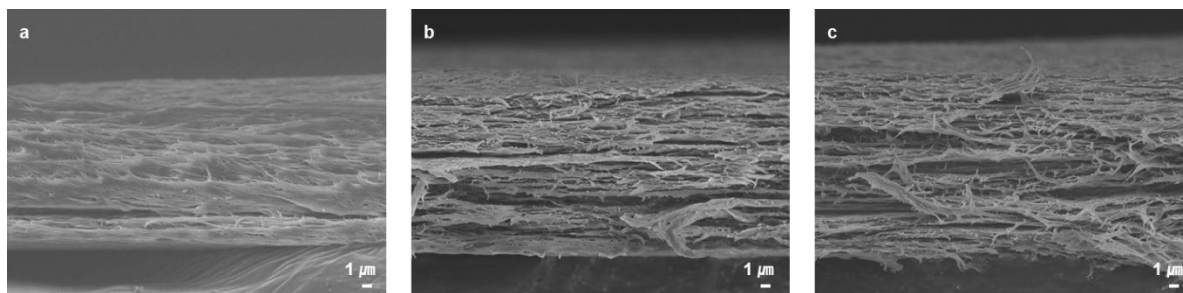

**Fig. S1.** Cross section SEM images of the surface of the modified separators with the SiO<sub>2</sub> thin film as a function of the number of cycles of solution-process: a bare PE separator, b. 1 cycle, c. 2cycles .(SEM operating at 5 kV accelerating voltage at x 3000 magnifications)
